# Supplementary material for: Inoculation with Azospirillum brasilense Strains AbV5 and AbV6 Increases Nutrition, Chlorophyll, and Leaf Yield of Hydroponic Lettuce
Source: MDPI journal article supplement (doi:10.3390/plants12173107), 2023-08-29
Supplement: s1 [file s1]

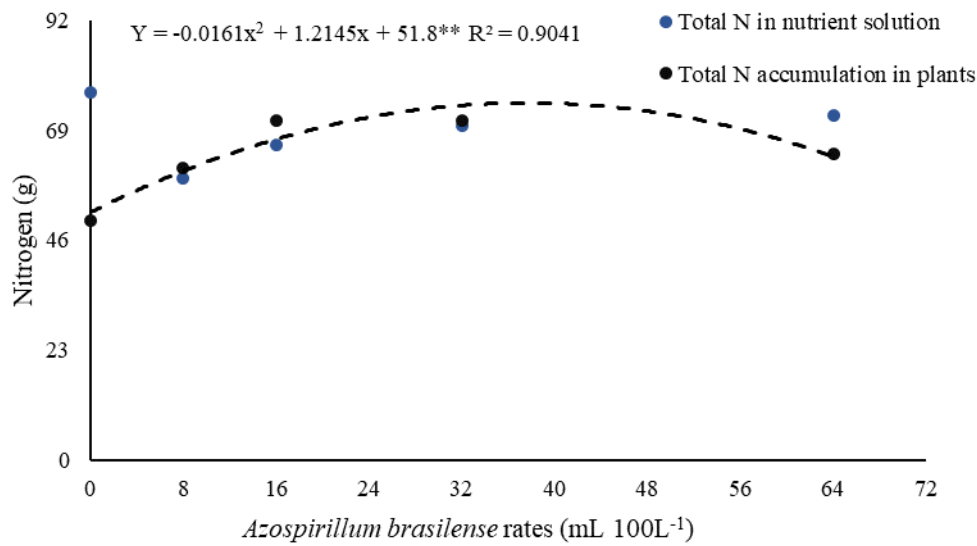

**Figure S1.** Total nitrogen accumulation in lettuce plants on the hydroponic cultivation bench and total nitrogen supply via nutrient solution throughout the growing period according to the doses of *Azospirillum brasilense* via nutrient solution.

**Table S1.** Summary of analysis of variance of shoot fresh matter (SFM), root fresh matter (RFM), shoot dry matter (SDM), root dry matter (RDM), number of leaves (NL), and yield (YLD).

| Source of variation | Mean Squares       |                    |                    |                    |                    |                    |
|---------------------|--------------------|--------------------|--------------------|--------------------|--------------------|--------------------|
|                     | SFM                | RFM                | SDM                | RDM                | NL                 | YLD                |
| Block               | 680.80             | 4.55               | 8.55               | 0.02               | 3.71               | 0.26               |
| Doses               | 8862.80**          | 177.99**           | 7.79**             | 0.42**             | 9.61*              | 3.37**             |
| Residue             | 302.30             | 13.77              | 0.52               | 0.01               | 2.29               | 0.11               |
| CV (%)              | 6.76               | 9.51               | 7.37               | 5.94               | 7.94               | 5.76               |
| Regression          |                    |                    |                    |                    |                    |                    |
| Linear              | 0.01**             | 0.001**            | 0.001**            | 0.001**            | 0.03*              | 0.001**            |
| Quadratic           | 0.001**            | 0.09 <sup>ns</sup> | 0.32 <sup>ns</sup> | 0.001**            | 0.01**             | 0.008**            |
| Deviation           | 0.47 <sup>ns</sup> | 0.95 <sup>ns</sup> | 0.74 <sup>ns</sup> | 0.06 <sup>ns</sup> | 0.32 <sup>ns</sup> | 0.47 <sup>ns</sup> |

\*\* significant at 1%, \* significant at 5%, <sup>ns</sup> not significant, CV - coefficient of variation.

**Table S2.** Summary of analysis of variance of nitrogen (N), phosphorus (P), potassium (K), calcium (Ca), magnesium (Mg), sulfur (S), boron (B), iron (Fe), manganese (Mn), and zinc (Zn) accumulation in shoots and roots of lettuce plants.

| Source of variation | Mean Squares - Shoot accumulation |                    |                    |                     |                    |                    |                    |                    |                    |                    |
|---------------------|-----------------------------------|--------------------|--------------------|---------------------|--------------------|--------------------|--------------------|--------------------|--------------------|--------------------|
|                     | N                                 | P                  | K                  | Ca                  | Mg                 | S                  | B                  | Fe                 | Mn                 | Zn                 |
| Block               | 3.05                              | 0.22               | 9.54               | 1.22                | 0.11               | 0.03               | 5.08               | 8940               | 220.9              | 128.1              |
| Doses               | 4.02**                            | 0.44**             | 7.65**             | 1.37*               | 0.11**             | 0.03*              | 3.92**             | 13646**            | 513.1**            | 157.6**            |
| Residue             | 0.71                              | 0.02               | 1.23               | 0.26                | 0.01               | 0.007              | 0.35               | 921                | 53.40              | 18.85              |
| CV (%)              | 10.24                             | 7.65               | 12.20              | 15.44               | 10.41              | 13.29              | 11.08              | 8.34               | 13.33              | 10.07              |
| Regression          |                                   |                    |                    |                     |                    |                    |                    |                    |                    |                    |
| Linear              | 0.07 <sup>ns</sup>                | 0.01**             | 0.02*              | 0.63 <sup>ns</sup>  | 0.01**             | 0.01**             | 0.02*              | 0.76 <sup>ns</sup> | 0.01**             | 0.05*              |
| Quadratic           | 0.01**                            | 0.01**             | 0.01**             | 0.02*               | 0.01**             | 0.09 <sup>ns</sup> | 0.01**             | 0.01**             | 0.06 <sup>ns</sup> | 0.01**             |
| Deviation           | 0.12 <sup>ns</sup>                | 0.06 <sup>ns</sup> | 0.12 <sup>ns</sup> | 0.06 <sup>ns</sup>  | 0.07 <sup>ns</sup> | 0.53 <sup>ns</sup> | 0.13 <sup>ns</sup> | 0.08 <sup>ns</sup> | 0.43 <sup>ns</sup> | 0.06 <sup>ns</sup> |
| Source of variation | Mean Squares - Root accumulation  |                    |                    |                     |                    |                    |                    |                    |                    |                    |
|                     | N                                 | P                  | K                  | Ca                  | Mg                 | S                  | B                  | Fe                 | Mn                 | Zn                 |
| Block               | 0.004                             | 0.003              | 0.003              | 0.0006              | 0.002              | 0.002              | 0.004              | 72.90              | 0.37               | 1.37               |
| Doses               | 0.41**                            | 0.006**            | 0.20**             | 0.002 <sup>ns</sup> | 0.008**            | 0.02**             | 0.53**             | 1469**             | 14.09**            | 12.6**             |
| Residue             | 0.009                             | 0.0009             | 0.004              | 0.004               | 0.0008             | 0.001              | 0.009              | 62.62              | 0.50               | 0.42               |
| CV (%)              | 9.64                              | 9.48               | 8.22               | 20.34               | 10.70              | 12.65              | 8.76               | 7.36               | 8.85               | 7.77               |
| Regression          |                                   |                    |                    |                     |                    |                    |                    |                    |                    |                    |
| Linear              | 0.01**                            | 0.05*              | 0.01**             | 0.94 <sup>ns</sup>  | 0.02*              | 0.01**             | 0.01**             | 0.01**             | 0.01**             | 0.03*              |
| Quadratic           | 0.01**                            | 0.001**            | 0.01**             | 0.64 <sup>ns</sup>  | 0.01**             | 0.01**             | 0.01**             | 0.01**             | 0.01**             | 0.01**             |

|           |                    |                    |                    |                    |                    |                    |                    |                    |                    |                    |
|-----------|--------------------|--------------------|--------------------|--------------------|--------------------|--------------------|--------------------|--------------------|--------------------|--------------------|
| Deviation | 0.06 <sup>ns</sup> | 0.80 <sup>ns</sup> | 0.06 <sup>ns</sup> | 0.53 <sup>ns</sup> | 0.54 <sup>ns</sup> | 0.38 <sup>ns</sup> | 0.11 <sup>ns</sup> | 0.20 <sup>ns</sup> | 0.08 <sup>ns</sup> | 0.60 <sup>ns</sup> |
|-----------|--------------------|--------------------|--------------------|--------------------|--------------------|--------------------|--------------------|--------------------|--------------------|--------------------|

\*\* significant at 1%, \* significant at 5%, <sup>ns</sup> not significant, CV - coefficient of variation.

**Table S3.** Summary of analysis of variance of relative water content (RWC), leaf membrane integrity index (MI), internal CO<sub>2</sub> concentration (Ci), stomatal conductance (gs), net photosynthesis rate (A), transpiration (E), water use efficiency (WUE), and total chlorophyll content (ChlT).

| Source of variation | Mean Squares       |                    |                    |                    |                    |                    |                    |                    |
|---------------------|--------------------|--------------------|--------------------|--------------------|--------------------|--------------------|--------------------|--------------------|
|                     | RWC                | MI                 | Ci                 | gs                 | A                  | E                  | WUE                | ChlT               |
| Block               | 28.18              | 1.25               | 427.8              | 3049               | 1.16               | 0.39               | 0.03               | 0.001              |
| Doses               | 293.1**            | 88.70**            | 7510**             | 151437**           | 72.24**            | 6.52**             | 0.40**             | 0.13**             |
| Residue             | 14.52              | 1.33               | 799.6              | 4100               | 1.95               | 0.77               | 0.02               | 0.001              |
| CV (%)              | 4.38               | 1.29               | 8.36               | 9.70               | 10.94              | 8.55               | 10.10              | 3.69               |
| Regression          |                    |                    |                    |                    |                    |                    |                    |                    |
| Linear              | 0.01**             | 0.11 <sup>ns</sup> | 0.01**             | 0.01**             | 0.18 <sup>ns</sup> | 0.01**             | 0.01**             | 0.01**             |
| Quadratic           | 0.01**             | 0.00**             | 0.05*              | 0.01**             | 0.01**             | 0.01**             | 0.01**             | 0.00**             |
| Deviation           | 0.06 <sup>ns</sup> | 0.80 <sup>ns</sup> | 0.08 <sup>ns</sup> | 0.08 <sup>ns</sup> | 0.09 <sup>ns</sup> | 0.06 <sup>ns</sup> | 0.06 <sup>ns</sup> | 0.07 <sup>ns</sup> |

\*\* significant at 1%, \* significant at 5%, <sup>ns</sup> not significant, CV - coefficient of variation.

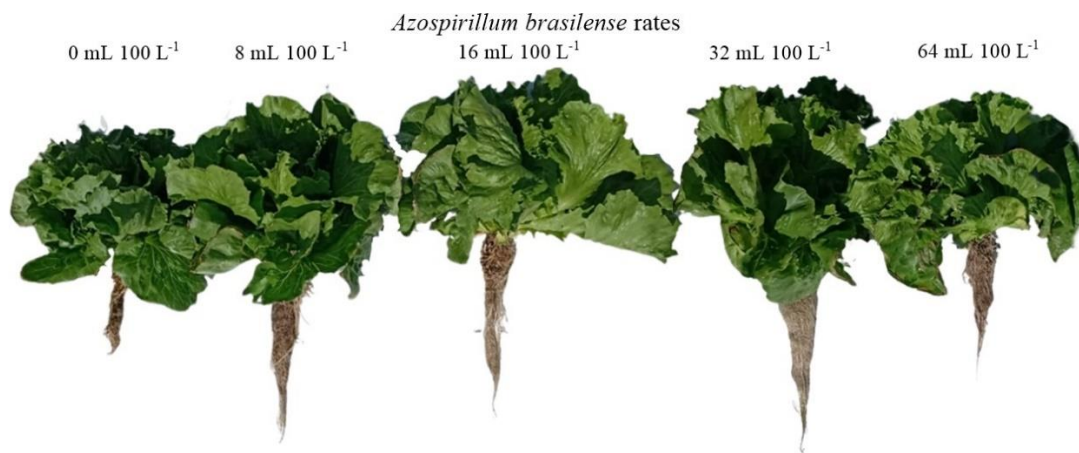

**Fig. S2.** *Azospirillum brasilense* doses increase shoot and root growth of iceberg lettuce plants in hydroponics.

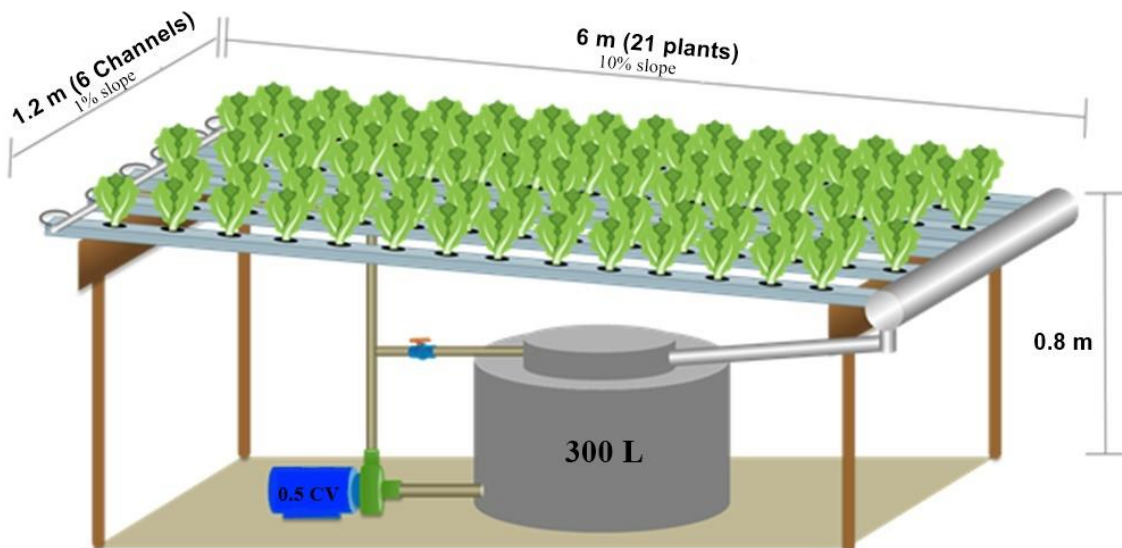

**Fig. S3.** Schematic of the hydroponics bench used in the test conduction. Ilha Solteira, SP, 2021.
